# Supplementary material
Source: MDPI journal article supplement (https://www.mdpi.com/2311-5637/7/3/148)
Supplement: s1 [file s1]

**Table S1: Yeast isolates of each species and place of isolation.**

| Species                           | Number of isolates | Isolation           |
|-----------------------------------|--------------------|---------------------|
| <i>Torulaspora delbrueckii</i>    | 18                 | AF, facilities      |
| <i>Metschnikowia pulcherrima</i>  | 16                 | AF, facilities      |
| <i>Lachancea thermotolerans</i>   | 16                 | AF                  |
| <i>Pichia kluyveri</i>            | 4                  | Vineyard, AF        |
| <i>Candida</i> spp.*              | 12                 | AF, facilities, air |
| <i>Zygosaccharomyces bailii</i>   | 7                  | AF                  |
| <i>Issatchenkia orientalis</i>    | 1                  | AF                  |
| <i>Williopsis pratensis</i>       | 10                 | Air                 |
| <i>Cryptococcus</i> spp.*         | 5                  | Air                 |
| <i>Debaryomyces hansenii</i>      | 3                  | Air, facilities     |
| <i>Sporidiobolus salmonicolor</i> | 6                  | Air                 |

\*Different species. AF: Alcoholic Fermentation

**Table S2: Percentage (%) of strains growing at the same level as control at 48 hours after inoculation, with different dosages of SO<sub>2</sub>.**

| Non-Saccharomyces species        | Dosage of SO <sub>2</sub> (mg/L) |     |    |     |
|----------------------------------|----------------------------------|-----|----|-----|
|                                  | 20                               | 40  | 80 | 120 |
| <i>Torulaspora delbrueckii</i>   | 100                              | 100 | 67 | 14  |
| <i>Metschnikowia pulcherrima</i> | 100                              | 57  | 0  | 0   |
| <i>Lachancea thermotolerans</i>  | 100                              | 19  | 6  | 0   |
| <i>Zygosaccharomyces bailii</i>  | 100                              | 100 | 33 | 16  |
| <i>Williopsis pratensis</i>      | 100                              | 70  | 0  | 0   |

**Table S3: Maximum level of SO<sub>2</sub> which allowed a similar growth to control at 24 hours and enzymatic activities of the twenty-four strains selected for the vinification trials.**

| Strains                     | SO <sub>2</sub><br>resistance<br>(mg/l) | Esterase | Esterase-<br>lipase | Lipase | LeucineA | ValineA | CystineA | β-<br>glucosidase | Pectinase | Cellulase | Xylanase | Glucanase |
|-----------------------------|-----------------------------------------|----------|---------------------|--------|----------|---------|----------|-------------------|-----------|-----------|----------|-----------|
| <i>Z. bailii</i> 71         | 20                                      | +        | -                   | -      | +        | -       | -        | -                 | +         | +         | -        | -         |
| <i>L. thermotolerans</i> 47 | 20                                      | +        | +                   | -      | +        | +       | -        | -                 | -         | +         | +        | +         |
| <i>L. thermotolerans</i> 53 | 20                                      | +        | +                   | +      | +        | +       | -        | -                 | -         | +         | +        | +         |
| <i>L. thermotolerans</i> 54 | 20                                      | +        | +                   | +      | +        | +       | -        | +                 | -         | -         | -        | -         |
| <i>L. thermotolerans</i> 57 | 20                                      | +        | +                   | -      | +        | +       | +        | -                 | +         | +         | +        | +         |
| <i>T. delbrueckii</i> 13    | 40                                      | +        | +                   | -      | +        | -       | -        | -                 | +         | -         | -        | -         |
| <i>T. delbrueckii</i> 17    | 80                                      | +        | +                   | -      | +        | -       | -        | -                 | +         | -         | -        | -         |
| <i>T. delbrueckii</i> 18    | 80                                      | +        | +                   | -      | +        | -       | -        | -                 | +         | +         | -        | -         |
| <i>T. delbrueckii</i> 19    | 40                                      | +        | +                   | -      | +        | -       | +        | -                 | +         | -         | -        | -         |
| <i>M. pulcherrima</i> 23    | 20                                      | +        | +                   | -      | +        | -       | -        | -                 | +         | -         | -        | +         |
| <i>M. pulcherrima</i> 25    | 20                                      | +        | +                   | -      | -        | -       | -        | -                 | +         | +         | -        | -         |
| <i>M. pulcherrima</i> 28    | 20                                      | +        | +                   | -      | +        | -       | -        | +                 | +         | +         | -        | -         |
| <i>M. pulcherrima</i> 29    | 20                                      | +        | +                   | -      | +        | +       | -        | +                 | +         | -         | -        | -         |
| <i>M. pulcherrima</i> 36    | 20                                      | +        | +                   | -      | +        | -       | -        | +                 | -         | -         | -        | -         |
| <i>C. zeylanoides</i> 342   | 20                                      | +        | +                   | -      | +        | +       | -        | -                 | +         | -         | -        | -         |
| <i>C. zeylanoides</i> 514   | 20                                      | +        | +                   | -      | +        | +       | -        | +                 | -         | -         | -        | -         |
| <i>C. zeylanoides</i> 115   | 20                                      | -        | +                   | -      | +        | +       | -        | +                 | -         | -         | -        | -         |
| <i>W. pratensis</i> 79      | 20                                      | +        | +                   | -      | +        | +       | +        | -                 | -         | -         | -        | -         |
| <i>W. pratensis</i> 84      | 20                                      | +        | +                   | -      | +        | +       | +        | -                 | -         | -         | -        | -         |
| <i>W. pratensis</i> 86      | 20                                      | +        | +                   | -      | +        | +       | +        | -                 | -         | -         | -        | -         |
| <i>W. pratensis</i> 87      | 40                                      | +        | +                   | -      | +        | +       | +        | -                 | -         | -         | -        | -         |
| <i>W. pratensis</i> 88      | 20                                      | +        | +                   | -      | +        | +       | +        | -                 | -         | -         | -        | -         |
| <i>Cr. uzbekistanensis</i>  | 0                                       | +        | +                   | -      | +        | -       | -        | +                 | +         | -         | -        | -         |
| <i>D. hansenii</i> 96       | 40                                      | +        | +                   | -      | -        | -       | -        | -                 | +         | +         | -        | +         |

**Table S4: Average enological traits of wines (with significant differences) fermented by different *Lachancea thermotolerans* (Lt) strains and statistical analysis.**

| Parameters       | Strains      |              |              |              |
|------------------|--------------|--------------|--------------|--------------|
|                  | <i>Lt 47</i> | <i>Lt 53</i> | <i>Lt 54</i> | <i>Lt 57</i> |
| pH               | 3.29 b       | 3.26 ab      | 3.19 a       | 3.33 b       |
| Total acidity    | 4.70 a       | 5.70 b       | 6.45 b       | 4.15 a       |
| Lactic acid      | 1.90 a       | 3.80 b       | 4.20 b       | 0.90 a       |
| Piruvic acid     | 20.0 a       | 21.0 b       | 28.5 b       | 26.0 ab      |
| Succinic acid    | 287 a        | 384 ab       | 372 ab       | 438 b        |
| Volatile acidity | 0.17 a       | 0.26 b       | 0.28 b       | 0.14 a       |

Different letters mean significant differences between genotypes (p<0.05)

**Table S5: Analytical parameters with significant differences produced by different non-*Saccharomyces* yeasts at the end of alcoholic fermentation.**

| Parameters             | Yeasts species and strains |         |          |          |          |         |         |          |         |          |         |         |
|------------------------|----------------------------|---------|----------|----------|----------|---------|---------|----------|---------|----------|---------|---------|
|                        | T18                        | T19     | M28      | M29      | L54      | L57     | LT1     | LT2      | Z71     | W87      | C342    | SVRB    |
| Alcohol strength (%)   | 14.1                       | 14.2    | 14.2     | 14.1     | 14.0     | 14.1    | 14.2    | 14.2     | 14.3    | 14.3     | 14.3    | 14.3    |
| Volatile acidity (g/L) | 0.09 a                     | 0.09 a  | 0.11 a   | 0.12 a   | 0.22 b   | 0.16 ab | 0.13 a  | 0.14 a   | 0.12 a  | 0.14 a   | 0.11 a  | 0.16 ab |
| Malic acid (g/L)       | 2.15 e                     | 2.15 e  | 1.95 cde | 1.79 bcd | 1.71 abc | 2.04 de | 2.18 d  | 1.95 cde | 1.62 ab | 1.46 a   | 1.44 a  | 2.46 f  |
| Glycerol (g/L)         | 8.90 d                     | 8.60 cd | 8.35 bcd | 8.20 bcd | 7.75 ab  | 7.70 ab | 8.15 bc | 8.30 bcd | 7.80 ab | 8.00 abc | 7.85 ab | 7.55 a  |
| Ethanal (mg/L)         | 22.5 bc                    | 25.0 c  | 10.5 a   | 13.5 a   | 35.0 d   | 29.0 cd | 25.5 c  | 22.5 c   | 23.0 c  | 14.0 ab  | 14.5 ab | 11.0 a  |
